# Supplementary material for: The Adsorption of Cu Species onto Pyrite Surface and Its Effect on Pyrite Flotation
Source: Hindawi journal article supplement (doi:10.1155/2016/4627929), 2016-01-01
Supplement: f1 [file 4627929.f1.doc]

**Electronic Supplementary Information**

**The Depression and Activation of Pyrite Flotation with Copper Sulfate**Bo Yanga,b,c, Xiong Tonga,b,c,*and Zhengbin Denga,b,c


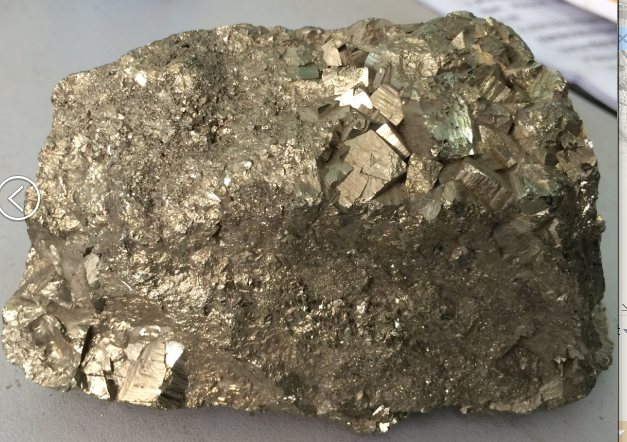


**Figure S1.** The pyrite sample used in experiments.

**Figure S2.** The XRD patterns of pyrite used in experiments.


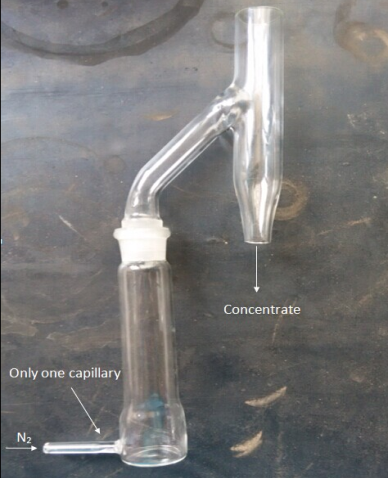


**Figure S3.** The modified Hallimond tube used in flotation tests.

**Figure S4.** The relationship curve between KBX concentration and absorbance


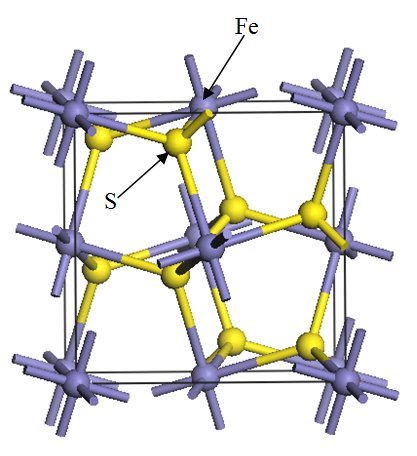


**Figure S5.** Pyrite crystal structure


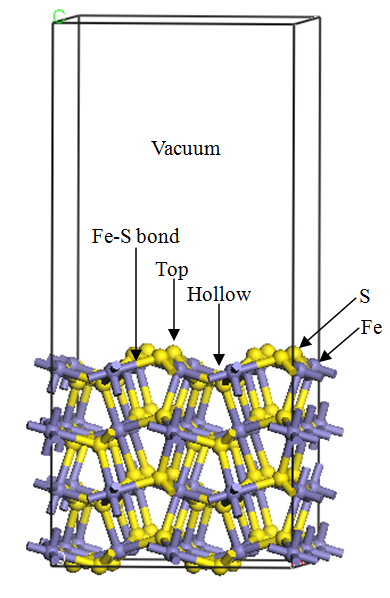


**Figure S6.** The crystal structure of pyrite (100) surface.
